# Supplementary material for: Comparison of the kinematics and kinetics of shoulder exercises performed with constant and elastic resistance
Source: Springer Nature journal article supplement (doi:10.1186/s13102-018-0111-7), 2018-11-28
Supplement: MOESM1 [file 16301562]

## Supplementary Material 1: Definition of the segmental coordinate system and the joint coordinate centers.

The segmental coordinate systems were defined as follows:

1) Torso coordinate system:

$\overrightarrow{eto1}$  (mediolateral axis) is perpendicular to the plane formed by the four torso markers.

$\overrightarrow{eto3}$  (vertical axis) is perpendicular to  $\overrightarrow{eto1}$  and lies in the plane formed by the connecting line

between the middle points of the markers STCA/SPT8 and STCR/SPC7 and

$\overrightarrow{eto1}$ .

$\overrightarrow{eto2}$  (anteroposterior axis) is perpendicular to  $\overrightarrow{eto1}$  and  $\overrightarrow{eto3}$ .

2) Shoulder girdle coordinate system:

$\overrightarrow{esg1}$  (mediolateral axis) is the connecting line between the left and the right acromion markers.

$\overrightarrow{esg3}$  (vertical axis) is perpendicular to  $\overrightarrow{esg1}$  and lies in the plane formed by the connecting line between the GHJC calculated as in Rab et al [16] and the acromion marker and  $\overrightarrow{esg1}$ .

$\overrightarrow{esg2}$  (anteroposterior axis) is perpendicular to  $\overrightarrow{esg1}$  and  $\overrightarrow{esg3}$ .

3) Upper arm coordinate system:

$\overrightarrow{eua1}$  (mediolateral axis) corresponds to the functionally estimated EJA.

$\overrightarrow{eua3}$  (vertical axis) is perpendicular to  $\overrightarrow{eua1}$  and lies in the plane formed by the GHJC and  $\overrightarrow{eua1}$ .

$\overrightarrow{eua2}$  (anteroposterior axis) is perpendicular to  $\overrightarrow{eua1}$  and  $\overrightarrow{eua3}$ .

4) Forearm coordinate system:

$\overrightarrow{efa3}$  (vertical axis) is the connecting line between the WJC and the EJC.

$\overrightarrow{efa1}$  (mediolateral axis) is perpendicular to  $\overrightarrow{efa3}$  and lies in the plane formed by the markers WRA and WRB and the EJC.

$\overrightarrow{efa2}$  (anteroposterior axis) is perpendicular to  $\overrightarrow{efa1}$  and  $\overrightarrow{efa3}$ .

5) Hand coordinate system:

$\overrightarrow{eha2}$  (anteroposterior axis) is perpendicular to the plane formed by the four hand markers.

$\overrightarrow{eha3}$  (vertical axis) is perpendicular to  $\overrightarrow{eha2}$  and lies in the plane formed by the connecting line between the middle points of the markers DM2/DM5 and CM2/CM5 and  $\overrightarrow{eha2}$ .

$\overrightarrow{eha1}$  (mediolateral axis) is perpendicular to  $\overrightarrow{eha2}$  and  $\overrightarrow{eha3}$ .

Joint coordinate systems were defined the follows:

1) Sternoclavicular joint coordinate system:

$\overrightarrow{eSC1}$  (flexion/extension axis) is fixed at the proximal segment (torso) and corresponds to  $\overrightarrow{eto1}$ .

$\overrightarrow{eSC3}$  (internal/external rotation axis) is fixed at the distal segment (shoulder girdle) and corresponds to  $\overrightarrow{esg3}$ .

$\overrightarrow{eSC2}$  = floating axis (adduction/abduction axis) is perpendicular to  $\overrightarrow{eSC1}$  and  $\overrightarrow{eSC3}$ .

2) Glenohumeral joint coordinate system:

$\overrightarrow{eGH2}$  (adduction/abduction axis) is fixed at the proximal segment (shoulder girdle) and corresponds to  $\overrightarrow{esg2}$ .

$\overrightarrow{eGH3}$  (internal/external rotation axis) is fixed at the distal segment (upper arm) and corresponds to  $\overrightarrow{eua3}$ .

$\overrightarrow{eGH1}$  = floating axis (flexion/extension axis) is perpendicular to  $\overrightarrow{eGH2}$  and  $\overrightarrow{eGH3}$

3) Elbow joint coordinate system:

$\overrightarrow{eEL1}$  (flexion/extension axis) is fixed at the proximal segment (upper arm) and corresponds to  $\overrightarrow{eua1}$ .

$\overrightarrow{eEL3}$  (internal/external rotation axis) is fixed at the distal segment (forearm) and corresponds to  $\overrightarrow{efa3}$ .

$\overrightarrow{eEL2}$  = floating axis (adduction/abduction axis) is perpendicular to  $\overrightarrow{eEL1}$  and  $\overrightarrow{eEL3}$ .

4) Wrist joint coordinate system:

$\overrightarrow{eWR1}$  (flexion/extension axis) is fixed at the proximal segment (forearm) and corresponds to  $\overrightarrow{efa1}$ .

$\overrightarrow{eWR3}$  (internal/external rotation axis) is fixed at the distal segment (hand) and corresponds to  $\overrightarrow{eha3}$ .

$\overrightarrow{eWR2}$  = floating axis (adduction/abduction axis) is perpendicular to  $\overrightarrow{eWR1}$  and  $\overrightarrow{eWR3}$ .
