# Supplementary material for: Comparison of the kinematics and kinetics of shoulder exercises performed with constant and elastic resistance
Source: Springer Nature journal article supplement (doi:10.1186/s13102-018-0111-7), 2018-11-28
Supplement: MOESM3 [file 16301562]

**Table S1:** Basic motion tasks (BMT) for the functional estimation of the GHJC, EJC, EJA, and WJC

---

|                  |                                                                                                                                    |
|------------------|------------------------------------------------------------------------------------------------------------------------------------|
| Shoulder<br>BMT1 | Flexion/extension movement in the shoulder in the sagittal plane while keeping the arm straight (3 repetitions)                    |
| Shoulder<br>BMT2 | Abduction/adduction movement in the shoulder in the frontal plane while keeping the arm straight (3 repetitions)                   |
| Shoulder<br>BMT3 | Horizontal flexion/extension movement in the shoulder in the transversal plane while keeping the arm straight (3 repetitions)      |
| Shoulder<br>BMT4 | Circumduction movement in the shoulder while keeping the arm straight (3 repetitions)                                              |
| Elbow<br>BMT1    | Flexion/extension movement in the elbow with a flexion angle of 90° in the shoulder and the thumb pointing upwards (3 repetitions) |
| Elbow<br>BMT2    | Pronation/supination movement in the elbow with a flexion angle of 90° in the shoulder (3 repetitions)                             |
| Wrist<br>BMT1    | Dorsal extension/palmar flexion movement in the wrist with a flexion angle of 90° in the shoulder (3 repetitions)                  |
| Wrist<br>BMT2    | Radial/ulnar deviation movement in the wrist with a flexion angle of 90° in the shoulder (3 repetitions)                           |
| Wrist<br>BMT3    | Circumduction movement in the wrist with a flexion angle of 90° in the shoulder (3 repetitions)                                    |

---

Shoulder exercises with constant and elastic resistance

TableS 2: Fixed effects coefficients ( $\beta$ ) and standard error (SE) of the mixed linear model for the internal rotation exercise

|                                                  |                          | Intercept |               | CR      |               | Elb_int |               | Elb20_int |               | Sho20_int |               | Sho20_com |               | [CR]*[Elb_int] |               | [CR]*[Elb20_int] |               | [CR]*[Sho20_int] |               | [CR]*[Sho20_com] |               |
|--------------------------------------------------|--------------------------|-----------|---------------|---------|---------------|---------|---------------|-----------|---------------|-----------|---------------|-----------|---------------|----------------|---------------|------------------|---------------|------------------|---------------|------------------|---------------|
|                                                  |                          | $\beta$   | SE( $\beta$ ) | $\beta$ | SE( $\beta$ ) | $\beta$ | SE( $\beta$ ) | $\beta$   | SE( $\beta$ ) | $\beta$   | SE( $\beta$ ) | $\beta$   | SE( $\beta$ ) | $\beta$        | SE( $\beta$ ) | $\beta$          | SE( $\beta$ ) | $\beta$          | SE( $\beta$ ) | $\beta$          | SE( $\beta$ ) |
| Internal/<br>external<br>rotation in<br>the GHJC | $M_{max}$<br>[Nm/kg]     | -0.047    | 0.002         | -0.039  | 0.002         | 0.006   | 0.002         | 0.009     | 0.002         | 0.007     | 0.002         | 0.033     | 0.002         | 0.007          | 0.003         | 0.012            | 0.003         | -0.003           | 0.003         | 0.022            | 0.003         |
|                                                  | RoM [°]                  | 81.094    | 5.152         | -1.880  | 4.464         | 15.017  | 4.464         | 9.972     | 4.464         | 0.353     | 4.464         | 31.234    | 4.464         | -1.670         | 6.314         | 1.179            | 6.314         | 0.156            | 6.314         | -0.482           | 6.314         |
|                                                  | $\alpha(M_{max})$<br>[°] | -69.025   | 2.309         | 0.749   | 2.865         | 76.964  | 2.865         | 75.290    | 2.865         | 1.410     | 2.865         | 95.564    | 2.865         | -20.322        | 4.051         | -18.072          | 4.051         | 1.695            | 4.051         | -36.612          | 4.051         |
| Adduction/<br>abduction/<br>in the<br>GHJC       | $M_{max}$<br>[Nm/kg]     | 0.072     | 0.005         | -0.001  | 0.006         | -0.145  | 0.006         | -0.158    | 0.006         | -0.005    | 0.006         | -0.156    | 0.006         | 0.008          | 0.008         | 0.004            | 0.008         | 0.002            | 0.008         | 0.003            | 0.008         |
|                                                  | RoM [°]                  | 10.198    | 2.574         | 0.038   | 3.139         | 4.148   | 3.139         | 2.088     | 3.139         | -0.582    | 3.139         | 76.826    | 3.139         | -2.840         | 4.439         | -1.196           | 4.439         | -0.559           | 4.439         | 0.832            | 4.439         |
|                                                  | $\alpha(M_{max})$<br>[°] | -61.466   | 2.562         | 0.071   | 3.067         | 61.034  | 3.067         | 59.689    | 3.067         | -0.611    | 3.067         | 72.296    | 3.067         | -3.201         | 4.338         | -2.140           | 4.338         | -0.981           | 4.338         | -0.026           | 4.338         |

Shoulder exercises with constant and elastic resistance

**Table S3:** Fixed effects coefficients ( $\beta$ ) and standard error (SE) of the mixed linear model for the external rotation exercise

|                                                  |                          | Intercept |               | CR      |               | Elb_ext |               | Elb20_ext |               | Sho20_ext |               | Elb20_com |               | [CR]*[Elb_ext] |               | [CR]*[Elb20_ext] |               | [CR]*[Sho20_ext] |               | [CR]*[Elb20_com] |               |
|--------------------------------------------------|--------------------------|-----------|---------------|---------|---------------|---------|---------------|-----------|---------------|-----------|---------------|-----------|---------------|----------------|---------------|------------------|---------------|------------------|---------------|------------------|---------------|
|                                                  |                          | $\beta$   | SE( $\beta$ ) | $\beta$ | SE( $\beta$ ) | $\beta$ | SE( $\beta$ ) | $\beta$   | SE( $\beta$ ) | $\beta$   | SE( $\beta$ ) | $\beta$   | SE( $\beta$ ) | $\beta$        | SE( $\beta$ ) | $\beta$          | SE( $\beta$ ) | $\beta$          | SE( $\beta$ ) | $\beta$          | SE( $\beta$ ) |
| Internal/<br>external<br>rotation in<br>the GHJC | $M_{max}$<br>[Nm/kg]     | 0.069     | 0.003         | 0.019   | 0.003         | -0.011  | 0.003         | -0.009    | 0.003         | 0.006     | 0.003         | -0.023    | 0.003         | 0.008          | 0.005         | 0.008            | 0.004         | 0.009            | 0.005         | 0.005            | 0.004         |
|                                                  | RoM [°]                  | 68.943    | 4.852         | 0.184   | 3.781         | 24.724  | 3.874         | 23.997    | 3.781         | 6.862     | 3.781         | 43.592    | 3.781         | -4.033         | 5.413         | -3.605           | 5.347         | -0.843           | 5.413         | 0.827            | 5.347         |
|                                                  | $\alpha(M_{max})$<br>[°] | -42.958   | 2.027         | 8.045   | 2.176         | 29.814  | 2.230         | 29.420    | 2.176         | 12.301    | 2.176         | 36.134    | 2.176         | 5.264          | 3.116         | 4.110            | 3.078         | 0.555            | 3.116         | 14.777           | 3.078         |
| Adduction/<br>abduction in<br>the GHJC           | $M_{max}$<br>[Nm/kg]     | 0.103     | 0.006         | 0.003   | 0.007         | -0.020  | 0.007         | -0.007    | 0.007         | 0.021     | 0.007         | 0.038     | 0.007         | -0.009         | 0.010         | -0.009           | 0.010         | -0.004           | 0.010         | -0.008           | 0.010         |
|                                                  | RoM [°]                  | 13.632    | 2.626         | 0.546   | 3.120         | -3.307  | 3.196         | -3.367    | 3.120         | -0.483    | 3.120         | 76.749    | 3.120         | -0.613         | 4.467         | -2.239           | 4.412         | -1.612           | 4.467         | 4.740            | 4.412         |
|                                                  | $\alpha(M_{max})$<br>[°] | -53.492   | 2.646         | -1.742  | 2.648         | 41.913  | 2.714         | 40.752    | 2.648         | -0.145    | 2.648         | #####     | 2.648         | -0.403         | 3.792         | 0.482            | 3.745         | -1.775           | 3.792         | 1.774            | 3.745         |

**Table S4:** Random effects coefficients and standard error (SE) for the linear mixed model of the external and internal rotation exercises

|                                         |                        | external rotation exercise |        |                                        |        | internal rotation exercise |        |                                        |        |
|-----------------------------------------|------------------------|----------------------------|--------|----------------------------------------|--------|----------------------------|--------|----------------------------------------|--------|
|                                         |                        | Residual                   |        | Intercept variance [subject = Subject] |        | Residual                   |        | Intercept variance [subject = Subject] |        |
|                                         |                        | Estimate                   | SE     | Estimate                               | SE     | Estimate                   | SE     | Estimate                               | SE     |
| Internal/ external rotation in the GHJC | $M_{\max}$ [Nm/kg]     | 0.000                      | 0.000  | 0.000                                  | 0.000  | 0.000                      | 0.000  | 0.000                                  | 0.000  |
|                                         | RoM [°]                | 85.759                     | 12.316 | 196.800                                | 87.782 | 119.582                    | 16.997 | 198.924                                | 89.937 |
|                                         | $\alpha(M_{\max})$ [°] | 28.415                     | 4.079  | 20.874                                 | 10.121 | 49.236                     | 6.998  | 14.754                                 | 8.420  |
| Adduction/ abduction in the GHJC        | $M_{\max}$ [Nm/kg]     | 0.000                      | 0.000  | 0.000                                  | 0.000  | 0.000                      | 0.000  | 0.000                                  | 0.000  |
|                                         | RoM [°]                | 58.407                     | 8.391  | 24.349                                 | 13.009 | 59.107                     | 8.401  | 20.403                                 | 11.252 |
|                                         | $\alpha(M_{\max})$ [°] | 42.085                     | 6.043  | 41.963                                 | 19.735 | 56.457                     | 8.024  | 22.288                                 | 11.938 |
